# Supplementary material
Source: PubMed Central journal article supplement (PMC4505261)
Supplement: AAC.00487-15_zac008154248so1.pdf [file AAC.00487-15_zac008154248so1.pdf]

1 **Supplemental Material**

2

3 **Supplemental Table 1. Individual Viral Loads, Symptom Scores, and Respiration Rates in Individual bRSV-infected Calves**  
4 **from Study 1.**

5

| <b>Parameter</b>                                                                | <b>Group 1<br/>GS1 (2mg/kg BID)<br/>Individual Calves</b> |            |            |            | <b>Group 2<br/>Placebo<br/>Individual Calves</b> |            |            |            |
|---------------------------------------------------------------------------------|-----------------------------------------------------------|------------|------------|------------|--------------------------------------------------|------------|------------|------------|
|                                                                                 | <b>1-1</b>                                                | <b>1-2</b> | <b>1-3</b> | <b>1-4</b> | <b>2-1</b>                                       | <b>2-2</b> | <b>2-3</b> | <b>2-4</b> |
| AUC of log <sub>10</sub> Viral Load<br>(log <sub>10</sub><br>bRSV/GAPDH×day/mL) | 10.13                                                     | 2.06       | 6.20       | 5.26       | 8.23                                             | 21.69      | 23.91      | 21.74      |
| AUC of Symptom Score<br>(score×day)                                             | 758.0                                                     | 135.0      | 364.0      | 208.0      | 1399.5                                           | 1523.5     | 3648.5     | 1078.0     |
| AUC of Respiration Rate<br>(breaths×day/min)                                    | 318.0                                                     | 279.0      | 325.0      | 250.0      | 434.5                                            | 480.0      | 720.0      | 400.0      |

6

7 **Supplemental Table 2. Individual Viral Loads, Symptom Scores, and Respiration Rates in Individual bRSV-infected Calves**  
 8 **from Study 2.**

9

| Parameter                                                                        | Group 1<br>GS1 at 4 mg/kg/day<br>(Initiated 24 h.p.i. <sup>a</sup> )<br>Individual Calves <sup>b</sup> |       |       | Group 2<br>GS1 at 4 mg/kg/day<br>(Initiated 72 h.p.i.)<br>Individual Calves |        |       |       |       |       | Group 3<br>Placebo<br>Individual Calves |       |        |        |
|----------------------------------------------------------------------------------|--------------------------------------------------------------------------------------------------------|-------|-------|-----------------------------------------------------------------------------|--------|-------|-------|-------|-------|-----------------------------------------|-------|--------|--------|
|                                                                                  | 1-1                                                                                                    | 1-2   | 1-4   | 2-1                                                                         | 2-2    | 2-3   | 2-4   | 2-5   | 2-6   | 3-1                                     | 3-2   | 3-3    | 3-4    |
| AUC of log <sub>10</sub> Viral Load<br>(log <sub>10</sub> bRSV/GAPDH<br>×day/mL) | 1.2                                                                                                    | 7.4   | 17.1  | 6.8                                                                         | 19.3   | 23.5  | 23.9  | 27.7  | 11.4  | 16.2                                    | 8.9   | 23.6   | 37.7   |
| AUC of Symptom Score<br>(score×day)                                              | 451.0                                                                                                  | 725.0 | 797.0 | 856.0                                                                       | 1087.0 | 368.0 | 508.5 | 458.0 | 361.0 | 835.0                                   | 648.0 | 2087.0 | 1033.0 |
| AUC of Respiration<br>Rate (breaths×day/min),<br>mean                            | 226                                                                                                    | 235   | 202   | 261                                                                         | 377    | 258   | 206   | 218   | 256   | 250                                     | 213   | 457    | 358    |

10 <sup>a</sup> hpi: hours post-inoculation

11 <sup>b</sup> Calf 1-3 was excluded from analysis due to secondary infection

12 **Supplemental Table 3. Study 1: Gross Pathology and Lung Histopathology**

13

| Animal ID                         | Gross Pathology                                                                                | Lung Histopathology                                                                                                                                                                                                                                                                                                                             |
|-----------------------------------|------------------------------------------------------------------------------------------------|-------------------------------------------------------------------------------------------------------------------------------------------------------------------------------------------------------------------------------------------------------------------------------------------------------------------------------------------------|
| <b>Group 1 GS1 4mg/kg/day BID</b> |                                                                                                |                                                                                                                                                                                                                                                                                                                                                 |
| *1-1                              | Mild bilateral areas of atelectasis (<5% lung); 0% consolidation                               | Minimal neutrophilic bronchopneumonia with pleocellular bronchiolitis                                                                                                                                                                                                                                                                           |
| 1-2                               | No gross lesions: 0% consolidation                                                             | Miminal scattered foci of neutrophilic bronchiolar exudate                                                                                                                                                                                                                                                                                      |
| 1-3                               | No gross lesions: 0% consolidation; a focal fibrous adhesion on the thoracic wall.             | Mild neutrophilic bronchial exudate; occasional lymphoid aggregates in bronchial and bronchiolar epithelium; no active bronchopneumonia or exudation in lung.                                                                                                                                                                                   |
| 1-4                               | Mimimal focal unilateral multilobular discoloration, right middle lobe (RML), 0% consolidation | Mainstem bronchus has mild diffuse lymphoplasmacytic mucosal infiltrate; multilobular areas of atelectasis with peribronchiolar septal and focal pleural infiltrate of lymphocytes and plasma cells in RML; other areas unremarkable                                                                                                            |
| <b>Group 2 – Vehicle</b>          |                                                                                                |                                                                                                                                                                                                                                                                                                                                                 |
| 2-1                               | 30% of total lung consolidated                                                                 | Neutrophilic bronchointerstitial pneumonia; epithelial hyperplasia of bronchioles, obliterating bronchiolitis; type II epithelial hyperplasia with occasional multinucleated giant cells in alveoli; lymphofollicular hyperplasia in bronchial lymph node. bRSV positive on lung immunostain.                                                   |
| 2-2                               | 25% of total lung consolidated                                                                 | Confluent bronchointerstitial pneumonia with neutrophilic infiltrate in bronchioles and alveoli of consolidated areas; hyperplastic epithelium and focal necrosis of bronchial epithelium; expansion of alveolar septa and proliferation of type II epithelial cells.                                                                           |
| 2-3                               | 60% of total lung consolidated                                                                 | Widespread bronchointerstitial pneumonia with neutrophilic exudation in which bronchioles have hyperplastic epithelium with focal necrosis and surrounding lymphoplasmocytic infiltrate; in bronchioles multifocal epithelial syncytia and syncytia in alveolar spaces; type II epithelial cell hyperplasia. bRSV positive on lung immunostain. |
| 2-4                               | 20% of total lung consolidated                                                                 | In consolidated areas patchy to lobular and confluent bronchointerstitial pneumonia with mild to moderate neutrophilic exudation into alveolar spaces; hyperplastic bronchiolar epithelium in grossly affected areas and type II alveolar epithelial hyperplasia. bRSV positive on lung immunostain.                                            |

14 \*This calf had an umbilical abscess visible at necropsy that may have caused systemic signs of inflammation.

15 **Supplemental Table 4. Study 2: Gross Pathology and Lung Histopathology**

16

| Animal ID                               | Gross Pathology                                                         | Histopathology                                                                                                                                                                                                                                                                                                        |
|-----------------------------------------|-------------------------------------------------------------------------|-----------------------------------------------------------------------------------------------------------------------------------------------------------------------------------------------------------------------------------------------------------------------------------------------------------------------|
| <b>Group 1- GS1 4 mg/kg Day 1 start</b> |                                                                         |                                                                                                                                                                                                                                                                                                                       |
| 1-1                                     | Minimal multifocal atelectasis (<5% lung)                               | Focal lobular atelectasis and bronchopneumonia with neutrophilic exudate into bronchioles; mild lymphoplasmacytic infiltrate in mainstem bronchus; <i>Mycoplasma bovis</i> isolated; bRSV negative on immunostain                                                                                                     |
| 1-2                                     | Minimal multifocal multilobular atelectasis (<1% lung)                  | Mild bilateral neutrophilic histiocytic bronchopneumonia; <i>Mycoplasma bovis</i> isolated; bRSV negative on immunostain                                                                                                                                                                                              |
| 1-3*                                    | Moderate bilateral consolidation (15% lung)                             | Acute suppurative bronchopneumonia, multifocal necrotic foci with <i>Mannheimia haemolytica</i> and <i>Mycoplasma bovis</i> isolated; bRSV negative on immunostain                                                                                                                                                    |
| 1-4                                     | Mild bilateral multifocal consolidation (8-10% lung)                    | Regional multilobular bronchopneumonia with mild neutrophilic and histiocytic exudate in to bronchioles and alveolar spaces. No bronchiolitis observed. <i>Mycoplasma bovis</i> isolated; bRSV negative on immunostain                                                                                                |
| <b>Group 2 – GS1 4mg/kg Day 3 start</b> |                                                                         |                                                                                                                                                                                                                                                                                                                       |
| 2-1                                     | No gross lesions                                                        | No histologic lesions. <i>Mycoplasma bovis</i> isolated                                                                                                                                                                                                                                                               |
| 2-2                                     | Mild multifocal pulmonary consolidation with abscessation (5% lung)     | Mild lymphoplasmacytic infiltrate in large bronchi; chronic lesions of fibrinoneutrophilic exudation with macrophages. <i>Mycoplasma bovis</i> and <i>Pasteurella multocida</i> isolated; bRSV negative on immunostain                                                                                                |
| 2-3                                     | Moderate to severe pulmonary consolidation (35% lung)                   | In areas of gross consolidation multilobular consolidation with exudation of neutrophils and macrophages within bronchioles andn alveolar spaces. Occasional peribronchiolar lymphoplasmacytic infiltrate with fibroplasia; no lesions in other areas; <i>Mycoplasma bovis</i> isolated bRSV positive on immunostain. |
| 2-4                                     | Minimal focal pulmonary atelectasis (1% lung)                           | Minimal scattered areas of atelectasis; in these areas minimal neutrophilic exudate in collapsed bronchioles; remainder of lung unremarkable. <i>Mycoplasma bovis</i> isolated; bRSV negative on immunostain                                                                                                          |
| 2-5                                     | Mild bilateral multifocal lobular atelectasis (5% lung)                 | Disseminated neutrophilic histiocytic proliferative bronchiolitis with mild histiocytic neutrophilic bronchopneumonia and atelectasis. <i>Mycoplasma bovis</i> and <i>Mycoplasma bovirhinis</i> isolated; bRSV negative on immunostain                                                                                |
| 2-6                                     | Minimal focal multilobular consolidation, right middle lobe, (<1% lung) | Regional focal multilobular atelectasis with minimal histiocytic neutrophilic bronchopneumonia. <i>Mycoplasma bovis</i> isolated; bRSV negative on immunostain                                                                                                                                                        |
| <b>Group 3 – Vehicle day 1 start</b>    |                                                                         |                                                                                                                                                                                                                                                                                                                       |
| 3-1                                     | Severe bilateral anteroventral pulmonary consolidation (35% lung)       | Extensive neutrophilic histiocytic bronchopneumonia with mild necrotizing bronchiolitis, caseonecrotic foci; <i>Pasteurella mutocida</i> and <i>Mycoplasma bovis</i> isolated; bRSV negative on immunostain                                                                                                           |

|     |                                                                                    |                                                                                                                                                                                                                                                                        |
|-----|------------------------------------------------------------------------------------|------------------------------------------------------------------------------------------------------------------------------------------------------------------------------------------------------------------------------------------------------------------------|
| 3-2 | Minimal focal multilobular consolidation (<2% lung)                                | Focal neutrophilic bronchopneumonia with bronchiolar epithelial hyperplasia; bRSV negative on immunostain                                                                                                                                                              |
| 3-3 | Severe bilateral anteroventral pulmonary consolidation (45-50% lung)               | Affected lung lobes show extensive multilobular areas of neutrophilic bronchopneumonia with multifocal necrosuppurative bronchiolitis and focal necrosis; <i>Arcanobacterium pyogenes</i> ; <i>Mycoplasma bovis</i> isolated; bRSV negative on immunostain             |
| 3-4 | Minimal bilateral lobular to linear atelectasis and focal consolidation (<5% lung) | Widespread neutrophilic histiocytic bronchointerstitial pneumonia with proliferative bronchiolitis and alveolitis with mild obliterating bronchiolitis and focal lobular neutrophilic bronchopneumonia; <i>Mycoplasma bovis</i> isolated; bRSV positive on immunostain |

17 \* Excluded from analysis due to secondary infection  
18

19 **Supplemental Table 5. EC<sub>50</sub> values (μM) for RSV inhibitors against human and bovine RSV**

20

| <b>Compound</b> | <b>Mechanism of action</b> | <b>RSV A2</b> | <b>bRSV</b>      |                 |
|-----------------|----------------------------|---------------|------------------|-----------------|
|                 |                            | (HEp2 cells)  | (BAT2 cells)     | (BT cells)      |
| Ribavirin       | Polymerase                 | <b>13.7</b>   | <b>5.7</b>       | <b>19.4</b>     |
| RSV-604         | Nucleocapsid               | <b>2.1</b>    | <b>&gt; 100</b>  | <b>&gt; 100</b> |
| YM-53403        | Polymerase                 | <b>0.2</b>    | <b>&gt; 43.7</b> | <b>&gt; 100</b> |
| BI-D            | Polymerase                 | <b>0.12</b>   | <b>0.06</b>      | <b>0.02</b>     |
| TMC-353121      | Fusion                     | <b>0.001</b>  | <b>0.030</b>     | <b>0.014</b>    |
| BMS-433771      | Fusion                     | <b>0.005</b>  | <b>54.5</b>      | <b>3.4</b>      |

21

22 N = 2
